# Supplementary material for: Absence of Desmin in Myofibers of the Zebrafish Extraocular Muscles
Source: PubMed Central journal article supplement — Transl Vis Sci Technol. 2020 Sep 1;9(10):1. doi: 10.1167/tvst.9.10.1 (PMC7476663; doi:10.1167/tvst.9.10.1), 2020-09-01
Supplement: tvst-9-10-1_s001.pdf [file tvst-9-10-1_s001.pdf]

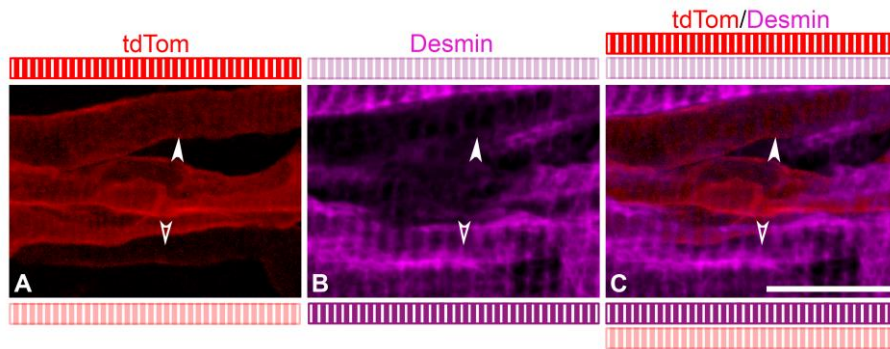

**Supplemental Figure 1. Strongly positive *smyhc1*:tdTomato slow myofibers correlated with weak desmin immunolabeling.** Strong desmin immunolabeling was found in slow myofibers with low *smyhc1*:tdTom content (open arrowhead) and weak desmin immunolabeling was found in slow myofibers with high *smyhc1*:tdTom content (arrowhead). A schematic illustration for immunolabeling (desmin) and transgenic expression (*smyhc1*:tdTom) is provided underneath each figure. Scale bar: 10  $\mu$ m.
