# Supplementary material for: Absence of Desmin in Myofibers of the Zebrafish Extraocular Muscles
Source: PubMed Central journal article supplement — Transl Vis Sci Technol. 2020 Sep 1;9(10):1. doi: 10.1167/tvst.9.10.1 (PMC7476663; doi:10.1167/tvst.9.10.1), 2020-09-01
Supplement: tvst-9-10-1_s002.pdf [file tvst-9-10-1_s002.pdf]

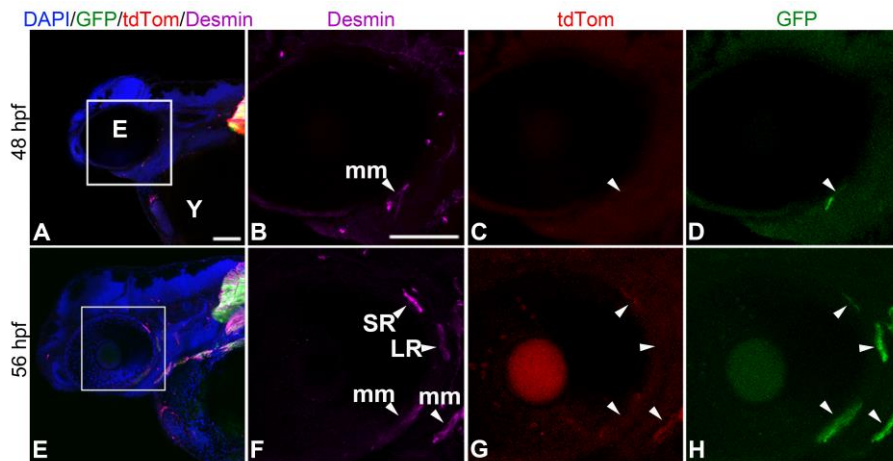

**Supplemental Figure 2. Myofibers containing MyHC<sub>slow</sub> in the zebrafish EOMs did not express desmin before the onset of *smyhc1* expression.** Expression of desmin (magenta) in double transgenic slow/fast *smyhc1*:tdTomato (red) /*mylz2*:GFP (green) embryos at 48 hpf (A-D) and 56 hpf (E-H) depicted in a lateral view. Square indicates area of magnification in panels to the right. Notice that only masticatory muscle (mm) but no EOMs could be detected at 48 hpf. In contrast, at 56 hpf, the lateral rectus (LR) and superior rectus (SR) muscles could be detected and they contained desmin but it was not possible to determine whether desmin was missing in individual myofibers. E: eye. Scale bars: 100  $\mu$ m.
