# Supplementary material for: Absence of Desmin in Myofibers of the Zebrafish Extraocular Muscles
Source: PubMed Central journal article supplement — Transl Vis Sci Technol. 2020 Sep 1;9(10):1. doi: 10.1167/tvst.9.10.1 (PMC7476663; doi:10.1167/tvst.9.10.1), 2020-09-01
Supplement: tvst-9-10-1_s003.pdf [file tvst-9-10-1_s003.pdf]

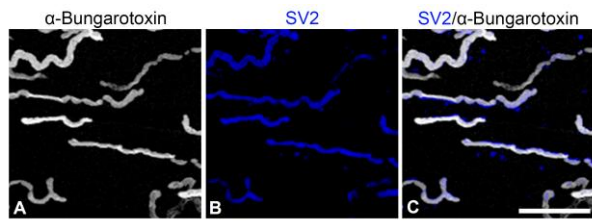

**Supplemental Figure 3. SV2 and  $\alpha$ -bungarotoxin staining overlapped in adult zebrafish EOMs.** Longitudinal view of zebrafish myofibers immunolabeled with  $\alpha$ -bungarotoxin (A), SV2 (B) and merged (C). Scale bar: 50  $\mu$ m
