# Supplementary material for: Absence of Desmin in Myofibers of the Zebrafish Extraocular Muscles
Source: PubMed Central journal article supplement — Transl Vis Sci Technol. 2020 Sep 1;9(10):1. doi: 10.1167/tvst.9.10.1 (PMC7476663; doi:10.1167/tvst.9.10.1), 2020-09-01
Supplement: tvst-9-10-1_s004.pdf [file tvst-9-10-1_s004.pdf]

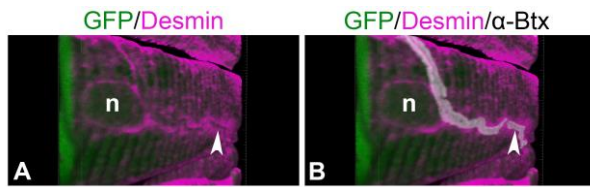

**Supplemental Figure 4. NMJs formed grooves on the surface of fast myofibers.** A 3-D reconstruction of confocal stacks visualizing grooves in the subsarcolemma of fast myofibers (*mylz2:GFP*) of the global layer labeled with antibodies against desmin and  $\alpha$ -bungarotoxin (A, B, arrowheads). n: nucleus.
